# Supplementary material
Source: publisher figshare collection journal article supplement (https://acs.figshare.com/ndownloader/files/4156189)
Supplement: Supplementary file 1 [file 4156189]

 
data_zj178

_vrf_PLAT_112_I
;
PROBLEM: _B ADDSYM Detects Additional (Pseudo) Symm. Elem...          m 
RESPONSE: The (Pseudo) Centre of Symmetry was due to the disorder
of F1 and O3. In fact, the symmetric mirror does not exist.  
;  

_vrf_PLAT_113_I
;
PROBLEM: _C ADDSYM Suggests Possible Pseudo/New Space-group.      P21/m   
RESPONSE: See above
;
 
_audit_creation_method            SHELXL-97
_chemical_name_systematic
;
 ?
;
_chemical_name_common             ?
_chemical_melting_point           ?
_chemical_formula_moiety      'C14 H12 Cl F O3'
_chemical_formula_sum         'C14 H12 Cl F O3'
_chemical_formula_weight          282.69
_chemical_absolute_configuration       'CHOOSE rm ad rmad syn or unk'

 
loop_
 _atom_type_symbol
 _atom_type_description
 _atom_type_scat_dispersion_real
 _atom_type_scat_dispersion_imag
 _atom_type_scat_source
 'C'  'C'   0.0033   0.0016
 'International Tables Vol C Tables 4.2.6.8 and 6.1.1.4'
 'H'  'H'   0.0000   0.0000
 'International Tables Vol C Tables 4.2.6.8 and 6.1.1.4'
 'O'  'O'   0.0106   0.0060
 'International Tables Vol C Tables 4.2.6.8 and 6.1.1.4'
 'F'  'F'   0.0171   0.0103
 'International Tables Vol C Tables 4.2.6.8 and 6.1.1.4'
 'Cl'  'Cl'   0.1484   0.1585
 'International Tables Vol C Tables 4.2.6.8 and 6.1.1.4'
 
_symmetry_cell_setting                 monoclinic
_symmetry_space_group_name_H-M        'P 1 21 1'
_symmetry_space_group_name_Hall       'P 2yb'
 
loop_
 _symmetry_equiv_pos_as_xyz
 'x, y, z'
 '-x, y+1/2, -z'
 
_cell_length_a                    8.1890(6)
_cell_length_b                    7.1850(5)
_cell_length_c                    11.2590(7)
_cell_angle_alpha                 90.00
_cell_angle_beta                  93.555(2)
_cell_angle_gamma                 90.00
_cell_volume                      661.18(8)
_cell_formula_units_Z             2
_cell_measurement_temperature     296(1)
_cell_measurement_reflns_used     3934
_cell_measurement_theta_min       3.2
_cell_measurement_theta_max       27.4
 
_exptl_crystal_description       'chunk'
_exptl_crystal_colour            'colorless'
_exptl_crystal_size_max           0.45
_exptl_crystal_size_mid           0.42
_exptl_crystal_size_min           0.27
_exptl_crystal_density_meas       ?
_exptl_crystal_density_diffrn     1.420
_exptl_crystal_density_method     'not measured'
_exptl_crystal_F_000              292
_exptl_absorpt_coefficient_mu     0.301
_exptl_absorpt_correction_type    multi-scan
_exptl_absorpt_correction_T_min   0.8764
_exptl_absorpt_correction_T_max   0.9231
_exptl_absorpt_process_details    'Higashi, T. (1995)'
 
_exptl_special_details
;
 ?
;
 
_diffrn_ambient_temperature       296(1)
_diffrn_radiation_wavelength      0.71073
_diffrn_radiation_type            MoK\a
_diffrn_radiation_source          'rolling anode'
_diffrn_radiation_monochromator   graphite
_diffrn_measurement_device_type   'Rigaku RAXIS-RAPID/ZJUG'
_diffrn_measurement_method         \w
_diffrn_detector_area_resol_mean   10.00
_diffrn_standards_number          ?
_diffrn_standards_interval_count  ?
_diffrn_standards_interval_time   ?
_diffrn_standards_decay_%         ?
_diffrn_reflns_number             6553
_diffrn_reflns_av_R_equivalents   0.0217
_diffrn_reflns_av_sigmaI/netI     0.0359
_diffrn_reflns_limit_h_min        -10
_diffrn_reflns_limit_h_max        10
_diffrn_reflns_limit_k_min        -9
_diffrn_reflns_limit_k_max        9
_diffrn_reflns_limit_l_min        -14
_diffrn_reflns_limit_l_max        14
_diffrn_reflns_theta_min          3.17
_diffrn_reflns_theta_max          27.48
_reflns_number_total              2906
_reflns_number_gt                 1454
_reflns_threshold_expression      >2sigma(I)
 
_computing_data_collection        'PROCESS-AUTO  (Rigaku,2006)'
_computing_cell_refinement        'PROCESS-AUTO  (Rigaku,2006)'
_computing_data_reduction         'CrystalStructure (Rigaku,2007)'
_computing_structure_solution     'SHELXS-97 (Sheldrick, 2008)'
_computing_structure_refinement   'SHELXL-97 (Sheldrick, 2008)'
_computing_molecular_graphics     'Ortep3 for windows (Farrugia,1997)'
_computing_publication_material   'WinGX (Farrugia, 1999)'
 
_refine_special_details
;
 Refinement of F^2^ against ALL reflections.  The weighted R-factor wR and
 goodness of fit S are based on F^2^, conventional R-factors R are based
 on F, with F set to zero for negative F^2^. The threshold expression of
 F^2^ > 2sigma(F^2^) is used only for calculating R-factors(gt) etc. and is
 not relevant to the choice of reflections for refinement.  R-factors based
 on F^2^ are statistically about twice as large as those based on F, and R-
 factors based on ALL data will be even larger.
;
 
_refine_ls_structure_factor_coef  Fsqd
_refine_ls_matrix_type            full
_refine_ls_weighting_scheme       calc
_refine_ls_weighting_details
 'calc w=1/[\s^2^(Fo^2^)+(0.0405P)^2^+0.6556P] where P=(Fo^2^+2Fc^2^)/3'
_atom_sites_solution_primary      direct
_atom_sites_solution_secondary    difmap
_atom_sites_solution_hydrogens    geom
_refine_ls_hydrogen_treatment     constr
_refine_ls_extinction_method      none
_refine_ls_extinction_coef        ?
_refine_ls_abs_structure_details
 'Flack H D (1983), Acta Cryst. A39, 876-881, Friedel pairs  1270'
_refine_ls_abs_structure_Flack    0.3(2)
_refine_ls_number_reflns          2906
_refine_ls_number_parameters      172
_refine_ls_number_restraints      3
_refine_ls_R_factor_all           0.1222
_refine_ls_R_factor_gt            0.0478
_refine_ls_wR_factor_ref          0.1494
_refine_ls_wR_factor_gt           0.1115
_refine_ls_goodness_of_fit_ref    1.000
_refine_ls_restrained_S_all       1.004
_refine_ls_shift/su_max           0.001
_refine_ls_shift/su_mean          0.000
 
loop_
 _atom_site_label
 _atom_site_type_symbol
 _atom_site_fract_x
 _atom_site_fract_y
 _atom_site_fract_z
 _atom_site_U_iso_or_equiv
 _atom_site_adp_type
 _atom_site_occupancy
 _atom_site_symmetry_multiplicity
 _atom_site_calc_flag
 _atom_site_refinement_flags
 _atom_site_disorder_assembly
 _atom_site_disorder_group
Cl1 Cl 0.10462(14) 0.2983(6) 0.13337(8) 0.0939(5) Uani 1 1 d . . .
F1 F 0.3059(5) 0.0608(4) 0.7001(3) 0.0827(13) Uani 1 1 d D . .
O1 O 0.7911(3) 0.2941(12) 0.6956(2) 0.0761(8) Uani 1 1 d . . .
O2 O 0.5905(3) 0.3003(12) 0.82276(19) 0.0758(8) Uani 1 1 d . . .
O3 O 0.3104(5) 0.5444(4) 0.7003(4) 0.0595(13) Uani 1 1 d . . .
C1 C 0.5148(4) 0.2942(15) 0.6206(3) 0.0616(10) Uani 1 1 d . . .
C2 C 0.5317(4) 0.2973(13) 0.5049(3) 0.0487(7) Uani 1 1 d . . .
H2 H 0.6315 0.2974 0.4697 0.058 Uiso 1 1 calc R . .
C3 C 0.3710(4) 0.3004(12) 0.4396(3) 0.0480(7) Uani 1 1 d . . .
C4 C 0.3285(4) 0.2944(13) 0.3191(3) 0.0575(9) Uani 1 1 d . . .
H4 H 0.4076 0.2888 0.2634 0.069 Uiso 1 1 calc R . .
C5 C 0.1639(4) 0.2968(12) 0.2846(3) 0.0547(8) Uani 1 1 d . . .
C6 C 0.0447(4) 0.2959(15) 0.3637(3) 0.0718(11) Uani 1 1 d . . .
H6 H -0.0651 0.2949 0.3369 0.086 Uiso 1 1 calc R . .
C7 C 0.0886(4) 0.297(2) 0.4835(3) 0.102(2) Uani 1 1 d . . .
H7 H 0.0092 0.2962 0.5391 0.123 Uiso 1 1 calc R . .
C8 C 0.2524(4) 0.2978(19) 0.5197(3) 0.0696(11) Uani 1 1 d . . .
C9 C 0.3369(4) 0.2724(3) 0.6429(3) 0.095(2) Uani 1 1 d D . .
C10 C 0.6491(4) 0.2938(15) 0.7138(3) 0.0610(10) Uani 1 1 d . . .
C11 C 0.7106(5) 0.2952(19) 0.9229(3) 0.0789(13) Uani 1 1 d . . .
H11A H 0.7829 0.4018 0.9205 0.095 Uiso 1 1 calc R . .
H11B H 0.7760 0.1829 0.9200 0.095 Uiso 1 1 calc R . .
C12 C 0.6216(6) 0.299(2) 1.0325(3) 0.0949(15) Uani 1 1 d . . .
H12A H 0.6984 0.2925 1.1004 0.142 Uiso 1 1 calc R . .
H12B H 0.5489 0.1939 1.0332 0.142 Uiso 1 1 calc R . .
H12C H 0.5596 0.4117 1.0355 0.142 Uiso 1 1 calc R . .
C13 C 0.2723(5) 0.4041(7) 0.7291(4) 0.0642(14) Uani 1 1 d D . .
C14 C 0.1698(5) 0.310(2) 0.8253(4) 0.103(2) Uani 1 1 d . . .
H14A H 0.1327 0.4038 0.8782 0.154 Uiso 1 1 calc R . .
H14B H 0.2367 0.2216 0.8697 0.154 Uiso 1 1 calc R . .
H14C H 0.0772 0.2479 0.7870 0.154 Uiso 1 1 calc R . .
 
loop_
 _atom_site_aniso_label
 _atom_site_aniso_U_11
 _atom_site_aniso_U_22
 _atom_site_aniso_U_33
 _atom_site_aniso_U_23
 _atom_site_aniso_U_13
 _atom_site_aniso_U_12
Cl1 0.0878(7) 0.1478(12) 0.0440(5) -0.0019(15) -0.0115(4) -0.001(2)
F1 0.072(3) 0.119(3) 0.057(2) 0.007(2) 0.005(2) -0.014(2)
O1 0.0382(13) 0.126(2) 0.0646(15) -0.009(4) 0.0047(11) -0.002(4)
O2 0.0438(13) 0.140(3) 0.0430(12) -0.006(4) -0.0028(10) -0.004(4)
O3 0.061(3) 0.0377(16) 0.082(3) 0.009(2) 0.020(3) -0.0033(18)
C1 0.0364(16) 0.102(3) 0.0463(17) 0.011(5) 0.0057(13) 0.001(4)
C2 0.0399(16) 0.059(2) 0.0482(16) -0.009(4) 0.0111(13) 0.001(4)
C3 0.0457(17) 0.056(2) 0.0421(15) -0.002(4) 0.0060(13) -0.003(4)
C4 0.056(2) 0.075(3) 0.0426(16) -0.005(4) 0.0091(14) -0.003(4)
C5 0.059(2) 0.064(2) 0.0402(15) -0.003(4) -0.0011(14) -0.010(4)
C6 0.0450(19) 0.116(4) 0.0538(19) 0.007(6) -0.0036(15) -0.003(5)
C7 0.0395(19) 0.220(6) 0.048(2) 0.027(7) 0.0047(15) -0.015(7)
C8 0.0407(17) 0.132(4) 0.0367(15) 0.002(5) 0.0053(13) 0.007(5)
C9 0.0408(19) 0.203(7) 0.0406(18) 0.020(5) 0.0041(15) -0.014(5)
C10 0.0422(18) 0.093(3) 0.0486(17) 0.005(5) 0.0045(14) -0.001(5)
C11 0.061(2) 0.120(4) 0.054(2) 0.001(6) -0.0147(17) -0.012(6)
C12 0.093(3) 0.138(4) 0.052(2) 0.001(7) -0.008(2) 0.012(8)
C13 0.039(2) 0.112(4) 0.041(2) -0.007(3) -0.0049(18) 0.007(3)
C14 0.056(2) 0.200(7) 0.054(2) 0.027(6) 0.0227(18) -0.004(7)
 
_geom_special_details
;
 All esds (except the esd in the dihedral angle between two l.s. planes)
 are estimated using the full covariance matrix.  The cell esds are taken
 into account individually in the estimation of esds in distances, angles
 and torsion angles; correlations between esds in cell parameters are only
 used when they are defined by crystal symmetry.  An approximate (isotropic)
 treatment of cell esds is used for estimating esds involving l.s. planes.
;
 
loop_
 _geom_bond_atom_site_label_1
 _geom_bond_atom_site_label_2
 _geom_bond_distance
 _geom_bond_site_symmetry_2
 _geom_bond_publ_flag
Cl1 C5 1.741(3) . ?
F1 C9 1.677(2) . ?
O1 C10 1.192(4) . ?
O2 C10 1.346(4) . ?
O2 C11 1.449(4) . ?
O3 C13 1.109(6) . ?
C1 C2 1.318(4) . ?
C1 C10 1.473(4) . ?
C1 C9 1.501(5) . ?
C2 C3 1.468(4) . ?
C2 H2 0.9300 . ?
C3 C8 1.366(4) . ?
C3 C4 1.379(4) . ?
C4 C5 1.380(5) . ?
C4 H4 0.9300 . ?
C5 C6 1.361(5) . ?
C6 C7 1.375(5) . ?
C6 H6 0.9300 . ?
C7 C8 1.377(5) . ?
C7 H7 0.9300 . ?
C8 C9 1.522(5) . ?
C9 C13 1.476(6) . ?
C11 C12 1.472(5) . ?
C11 H11A 0.9700 . ?
C11 H11B 0.9700 . ?
C12 H12A 0.9600 . ?
C12 H12B 0.9600 . ?
C12 H12C 0.9600 . ?
C13 C14 1.563(9) . ?
C14 H14A 0.9600 . ?
C14 H14B 0.9600 . ?
C14 H14C 0.9600 . ?
 
loop_
 _geom_angle_atom_site_label_1
 _geom_angle_atom_site_label_2
 _geom_angle_atom_site_label_3
 _geom_angle
 _geom_angle_site_symmetry_1
 _geom_angle_site_symmetry_3
 _geom_angle_publ_flag
C10 O2 C11 116.4(3) . . ?
C2 C1 C10 125.7(3) . . ?
C2 C1 C9 109.3(3) . . ?
C10 C1 C9 124.8(3) . . ?
C1 C2 C3 110.4(3) . . ?
C1 C2 H2 124.8 . . ?
C3 C2 H2 124.8 . . ?
C8 C3 C4 120.2(3) . . ?
C8 C3 C2 108.7(3) . . ?
C4 C3 C2 131.0(3) . . ?
C3 C4 C5 117.3(3) . . ?
C3 C4 H4 121.3 . . ?
C5 C4 H4 121.3 . . ?
C6 C5 C4 122.9(3) . . ?
C6 C5 Cl1 118.2(3) . . ?
C4 C5 Cl1 118.9(3) . . ?
C5 C6 C7 119.2(3) . . ?
C5 C6 H6 120.4 . . ?
C7 C6 H6 120.4 . . ?
C6 C7 C8 118.7(3) . . ?
C6 C7 H7 120.6 . . ?
C8 C7 H7 120.6 . . ?
C3 C8 C7 121.6(3) . . ?
C3 C8 C9 107.6(3) . . ?
C7 C8 C9 130.4(3) . . ?
C13 C9 C1 115.7(5) . . ?
C13 C9 C8 111.2(5) . . ?
C1 C9 C8 103.1(3) . . ?
C13 C9 F1 105.0(4) . . ?
C1 C9 F1 109.3(5) . . ?
C8 C9 F1 112.8(6) . . ?
O1 C10 O2 124.3(3) . . ?
O1 C10 C1 124.8(3) . . ?
O2 C10 C1 110.9(3) . . ?
O2 C11 C12 107.7(3) . . ?
O2 C11 H11A 110.2 . . ?
C12 C11 H11A 110.2 . . ?
O2 C11 H11B 110.2 . . ?
C12 C11 H11B 110.2 . . ?
H11A C11 H11B 108.5 . . ?
C11 C12 H12A 109.5 . . ?
C11 C12 H12B 109.5 . . ?
H12A C12 H12B 109.5 . . ?
C11 C12 H12C 109.5 . . ?
H12A C12 H12C 109.5 . . ?
H12B C12 H12C 109.5 . . ?
O3 C13 C9 105.8(4) . . ?
O3 C13 C14 140.0(7) . . ?
C9 C13 C14 114.1(7) . . ?
C13 C14 H14A 109.5 . . ?
C13 C14 H14B 109.5 . . ?
H14A C14 H14B 109.5 . . ?
C13 C14 H14C 109.5 . . ?
H14A C14 H14C 109.5 . . ?
H14B C14 H14C 109.5 . . ?
 
loop_
 _geom_torsion_atom_site_label_1
 _geom_torsion_atom_site_label_2
 _geom_torsion_atom_site_label_3
 _geom_torsion_atom_site_label_4
 _geom_torsion
 _geom_torsion_site_symmetry_1
 _geom_torsion_site_symmetry_2
 _geom_torsion_site_symmetry_3
 _geom_torsion_site_symmetry_4
 _geom_torsion_publ_flag
C10 C1 C2 C3 -178.9(8) . . . . ?
C9 C1 C2 C3 6.6(10) . . . . ?
C1 C2 C3 C8 -0.4(11) . . . . ?
C1 C2 C3 C4 -176.1(9) . . . . ?
C8 C3 C4 C5 3.8(12) . . . . ?
C2 C3 C4 C5 179.0(9) . . . . ?
C3 C4 C5 C6 -3.2(14) . . . . ?
C3 C4 C5 Cl1 177.6(6) . . . . ?
C4 C5 C6 C7 1.4(16) . . . . ?
Cl1 C5 C6 C7 -179.4(10) . . . . ?
C5 C6 C7 C8 -0.1(19) . . . . ?
C4 C3 C8 C7 -2.6(16) . . . . ?
C2 C3 C8 C7 -178.9(12) . . . . ?
C4 C3 C8 C9 170.5(8) . . . . ?
C2 C3 C8 C9 -5.7(11) . . . . ?
C6 C7 C8 C3 1(2) . . . . ?
C6 C7 C8 C9 -170.6(11) . . . . ?
C2 C1 C9 C13 -131.1(7) . . . . ?
C10 C1 C9 C13 54.3(11) . . . . ?
C2 C1 C9 C8 -9.6(10) . . . . ?
C10 C1 C9 C8 175.8(9) . . . . ?
C2 C1 C9 F1 110.6(7) . . . . ?
C10 C1 C9 F1 -64.0(10) . . . . ?
C3 C8 C9 C13 133.7(7) . . . . ?
C7 C8 C9 C13 -54.0(16) . . . . ?
C3 C8 C9 C1 9.1(10) . . . . ?
C7 C8 C9 C1 -178.6(14) . . . . ?
C3 C8 C9 F1 -108.6(7) . . . . ?
C7 C8 C9 F1 63.7(15) . . . . ?
C11 O2 C10 O1 -4.1(16) . . . . ?
C11 O2 C10 C1 178.3(8) . . . . ?
C2 C1 C10 O1 -0.9(17) . . . . ?
C9 C1 C10 O1 172.8(10) . . . . ?
C2 C1 C10 O2 176.7(9) . . . . ?
C9 C1 C10 O2 -9.6(13) . . . . ?
C10 O2 C11 C12 -178.5(9) . . . . ?
C1 C9 C13 O3 50.2(6) . . . . ?
C8 C9 C13 O3 -66.9(6) . . . . ?
F1 C9 C13 O3 170.8(3) . . . . ?
C1 C9 C13 C14 -132.1(5) . . . . ?
C8 C9 C13 C14 110.8(5) . . . . ?
F1 C9 C13 C14 -11.5(4) . . . . ?
 
_diffrn_measured_fraction_theta_max    0.996
_diffrn_reflns_theta_full              27.48
_diffrn_measured_fraction_theta_full   0.996
_refine_diff_density_max    0.439
_refine_diff_density_min   -0.362
_refine_diff_density_rms    0.060
